# Supplementary material
Source: publisher site journal article supplement (https://bdj.pensoft.net/article/download/suppl/3653720/)
Supplement: Supplementary file 1 [file  › doc.kml]

<?xml version="1.0" encoding="UTF-8"?>
<kml xmlns="http://www.opengis.net/kml/2.2" xmlns:gx="http://www.google.com/kml/ext/2.2" xmlns:xsi="http://www.w3.org/2001/XMLSchema-instance"
 xsi:schemaLocation="http://www.opengis.net/kml/2.2 http://schemas.opengis.net/kml/2.2.0/ogckml22.xsd http://www.google.com/kml/ext/2.2 http://code.google.com/apis/kml/schema/kml22gx.xsd">
<Document id="Donus_multifidus">
  <name>Donus_multifidus</name>
  <Snippet></Snippet>
  <Folder id="FeatureLayer0">
    <name>Donus_multifidus</name>
    <Snippet></Snippet>
    <Placemark id="ID_00000">
      <name>Donus multifidus</name>
      <Snippet></Snippet>
      <description><![CDATA[<html xmlns:fo="http://www.w3.org/1999/XSL/Format" xmlns:msxsl="urn:schemas-microsoft-com:xslt">

<head>

<META http-equiv="Content-Type" content="text/html">

<meta http-equiv="content-type" content="text/html; charset=UTF-8">

</head>

<body style="margin:0px 0px 0px 0px;overflow:auto;background:#FFFFFF;">

<table style="font-family:Arial,Verdana,Times;font-size:12px;text-align:left;width:100%;border-collapse:collapse;padding:3px 3px 3px 3px">

<tr style="text-align:center;font-weight:bold;background:#9CBCE2">

<td>Donus multifidus</td>

</tr>

<tr>

<td>

<table style="font-family:Arial,Verdana,Times;font-size:12px;text-align:left;width:100%;border-spacing:0px; padding:3px 3px 3px 3px">

<tr>

<td>FID</td>

<td>0</td>

</tr>

<tr bgcolor="#D4E4F3">

<td>Id</td>

<td>0</td>

</tr>

<tr>

<td>ID_NO</td>

<td>0</td>

</tr>

<tr bgcolor="#D4E4F3">

<td>BINOMIAL</td>

<td>Donus multifidus</td>

</tr>

<tr>

<td>PRESENCE</td>

<td>1</td>

</tr>

<tr bgcolor="#D4E4F3">

<td>ORIGIN</td>

<td>1</td>

</tr>

<tr>

<td>SEASONAL</td>

<td>1</td>

</tr>

<tr bgcolor="#D4E4F3">

<td>COMPILER</td>

<td>Anja Danielczak</td>

</tr>

<tr>

<td>YEAR</td>

<td>2017</td>

</tr>

<tr bgcolor="#D4E4F3">

<td>CITATION</td>

<td>Paulo Borges</td>

</tr>

</table>

</td>

</tr>

</table>

</body>

</html>

]]></description>
      <styleUrl>#PolyStyle00</styleUrl>
      <MultiGeometry>
        <Polygon>
          <extrude>0</extrude>          <altitudeMode>clampToGround</altitudeMode>
          <outerBoundaryIs><LinearRing><coordinates> -25.08889448636624,36.98157525504956,0 -25.08905389281881,36.98150392794855,0 -25.08915362869362,36.98146339706383,0 -25.08925172244302,36.98142888574653,0 -25.08935342761884,36.98139768406652,0 -25.08945847281137,36.9813698754195,0 -25.08956654895086,36.98134554174974,0 -25.08967736052313,36.98132475168799,0 -25.0897905034968,36.98130758308234,0 -25.08990558643787,36.98129409543802,0 -25.09002218121217,36.98128433904449,0 -25.09014009630636,36.98127834248889,0 -25.09025860307925,36.98127615529441,0 -25.09037721078391,36.98127778657053,0 -25.09049541073462,36.98128322939002,0 -25.09061269805146,36.98129246088091,0 -25.09072855027889,36.98130544032152,0 -25.09084245848265,36.98132211066471,0 -25.09095392729032,36.981342399405,0 -25.09112226375439,36.98137931059885,0 -25.09119821830841,36.98139854892764,0 -25.09126973639081,36.98141856448767,0 -25.09133749044874,36.981439556688,0 -25.09140145961531,36.98146153126547,0 -25.0914618331935,36.98148455344962,0 -25.09151872724186,36.98150866781766,0 -25.09160826922738,36.9815507923066,0 -25.09169372976178,36.98159525012913,0 -25.09177427365855,36.98164160560613,0 -25.09184935425108,36.98168954237097,0 -25.09191839941097,36.98173867949554,0 -25.09198126892708,36.98178889995227,0 -25.09203772718657,36.98184001501368,0 -25.09208761523115,36.98189188001143,0 -25.09215248899588,36.98196834015916,0 -25.09220884873682,36.98204270127076,0 -25.09225643600648,36.98211462112907,0 -25.09229510040057,36.9821838705796,0 -25.09232471316282,36.98225019974514,0 -25.0923361210843,36.9822822516588,0 -25.09234525614305,36.98231354238479,0 -25.0923521142738,36.98234405733692,0 -25.09235669364599,36.98237378748205,0 -25.09235899271718,36.98240272275132,0 -25.09235901080879,36.98243085447975,0 -25.09235617936807,36.982461732292,0 -25.09235010668349,36.98249423118124,0 -25.0923407396714,36.98252865297615,0 -25.09232791687142,36.98256559687829,0 -25.0922969075322,36.98263766773778,0 -25.09222210116293,36.98279068334303,0 -25.09220236231392,36.98283062792154,0 -25.09217944450943,36.98287167612949,0 -25.09215311390132,36.98291425262466,0 -25.09212286092213,36.98295918392405,0 -25.09206286060436,36.98304088172779,0 -25.09191432905944,36.98323215619424,0 -25.09187741132264,36.98328291966314,0 -25.09184598965726,36.98332926151323,0 -25.09181609290334,36.98337766129608,0 -25.0917907605349,36.98342395883075,0 -25.09176958815504,36.98346889638995,0 -25.09175238621218,36.98351288337401,0 -25.0917136954413,36.9836316914703,0 -25.09168374996848,36.98374218706183,0 -25.09166205102373,36.98384622503798,0 -25.09165426026388,36.98389600063547,0 -25.09164849623029,36.98394435510431,0 -25.09164474402222,36.98399150110945,0 -25.0916430268649,36.98403728238201,0 -25.09164334394928,36.98408172119705,0 -25.09164569541979,36.98412483270989,0 -25.09165008253107,36.98416663379845,0 -25.0916565060968,36.98420712888439,0 -25.09166496730728,36.98424632540199,0 -25.09167546729075,36.98428422851136,0 -25.09169212417802,36.9843337841031,0 -25.09171137940031,36.98438318343677,0 -25.09173292185055,36.98443163041166,0 -25.09175646289833,36.98447847771915,0 -25.09178164115409,36.98452303133848,0 -25.0918082777934,36.98456499841522,0 -25.09183614086486,36.98460401440837,0 -25.09186504017088,36.98463981400943,0 -25.09189759329588,36.98467455461073,0 -25.09193424602098,36.98470788360275,0 -25.09197500749243,36.98473980936366,0 -25.09201989192605,36.98477034307033,0 -25.09206890680952,36.98479949120095,0 -25.09212208905509,36.98482727695344,0 -25.0921794741048,36.98485371898667,0 -25.09224111868421,36.98487884353236,0 -25.09230632559284,36.98490241820294,0 -25.09237588392382,36.98492477641666,0 -25.09244994450065,36.98494596720224,0 -25.09252878544238,36.98496607044721,0 -25.09261209006067,36.98498503436822,0 -25.09270126879617,36.98500320640238,0 -25.09290451793692,36.98503860355365,0 -25.0930036577852,36.98505296018814,0 -25.09310019721545,36.98506409269425,0 -25.09319378398276,36.98507196073673,0 -25.09328418160733,36.9850765448633,0 -25.09337113131945,36.98507783533628,0 -25.09345455360676,36.9850758345516,0 -25.09353432569357,36.98507054555495,0 -25.09361035584503,36.98506197456553,0 -25.09371365243538,36.98504481624341,0 -25.09381814514724,36.98502166919052,0 -25.09392235568581,36.98499286085372,0 -25.09402477844432,36.98495880709894,0 -25.0941238650795,36.98492003051716,0 -25.09421835573954,36.98487703188235,0 -25.09430701734729,36.984830373382,0 -25.09438882185705,36.98478059700273,0 -25.09445238608267,36.98473619475386,0 -25.09451500943556,36.98468691949741,0 -25.09457638470337,36.98463301215816,0 -25.09463613493116,36.98457480312636,0 -25.09469396524856,36.98451256149446,0 -25.0947492691583,36.98444692134737,0 -25.09480153325402,36.98437849058583,0 -25.09485016500383,36.98430804358014,0 -25.09488058842225,36.98425892809732,0 -25.09490954607113,36.98420671242728,0 -25.09493714809085,36.98415119956419,0 -25.09496355823723,36.98409206122438,0 -25.0949887429623,36.98402946256664,0 -25.09501327635898,36.98396206738158,0 -25.09503756320846,36.98388879573312,0 -25.09506275712896,36.9838061772707,0 -25.09508392691402,36.98372751818889,0 -25.0951021248294,36.98364552712112,0 -25.09511741248679,36.98355992998351,0 -25.09512986658762,36.98347030008824,0 -25.09513951506913,36.98337665970136,0 -25.09514653503508,36.98327756873264,0 -25.09515102023826,36.98317180517407,0 -25.0951531013562,36.98305635240827,0 -25.09515076252931,36.98290428449926,0 -25.09514148817218,36.98275169312477,0 -25.09512534654693,36.98259969979353,0 -25.09510245528509,36.98244941220684,0 -25.09508791191219,36.98237747886123,0 -25.09506911411084,36.98230298127881,0 -25.09504588159054,36.98222518899851,0 -25.09501780109012,36.98214271153607,0 -25.09498973167485,36.98206771477516,0 -25.09495651729919,36.98198474911187,0 -25.09483132434315,36.98169042412052,0 -25.09478301844871,36.98157178678279,0 -25.09473767127389,36.98144866670069,0 -25.09470265412036,36.98133706584449,0 -25.09463518791435,36.98108918546256,0 -25.09457793770934,36.98085843270642,0 -25.0945296343989,36.98063967407607,0 -25.09448977010556,36.98043056236934,0 -25.09445787011882,36.98022836114728,0 -25.09443396386804,36.98003293954402,0 -25.09442497090925,36.97993747103903,0 -25.09441794162431,36.97984339335652,0 -25.09441287031152,36.97975062988735,0 -25.09440975349044,36.97965911647694,0 -25.09440770353715,36.97953658448121,0 -25.09440787751096,36.97943175112278,0 -25.09441029499876,36.97933585776374,0 -25.09441503512171,36.97924674304699,0 -25.09442063112202,36.97919161027381,0 -25.09443002916946,36.97913404914679,0 -25.09444331899715,36.97907348517941,0 -25.09446074537399,36.97900879394114,0 -25.09450016098786,36.97888724762339,0 -25.09457967043604,36.97867004426752,0 -25.09460857784534,36.97858707862414,0 -25.09463456545593,36.97850335387243,0 -25.09465387054815,36.97842815855596,0 -25.09466920338584,36.97834567161291,0 -25.09467389404296,36.97830656513484,0 -25.09467663522827,36.97826862428973,0 -25.09467743723388,36.97823165863925,0 -25.09467629779113,36.97819560565556,0 -25.09467321381078,36.97816037082016,0 -25.09466817878742,36.97812588135086,0 -25.09465751465049,36.9780745093772,0 -25.0946432208952,36.97802094255348,0 -25.09462517317104,36.97796470331394,0 -25.09460307959576,36.9779048773141,0 -25.09455103130107,36.97778266112856,0 -25.09444860507553,36.97756453072951,0 -25.0943545238008,36.97736596582085,0 -25.09426969161989,36.97719804045133,0 -25.0941868874919,36.97704648758455,0 -25.09410429791916,36.97690812166199,0 -25.09401914558172,36.97677858659952,0 -25.09397580659411,36.97671754136875,0 -25.09393184144289,36.97665880964015,0 -25.09388715627529,36.97660226812327,0 -25.09384170890684,36.97654786552102,0 -25.09379544321213,36.97649553471497,0 -25.09374831254439,36.97644522302358,0 -25.09368447201042,36.97638075892276,0 -25.09361850235154,36.97631750609718,0 -25.09355063775821,36.97625568903177,0 -25.09348110812412,36.97619551708293,0 -25.09341015978287,36.97613720230751,0 -25.09333799740883,36.97608091183774,0 -25.0932648384923,36.97602681525651,0 -25.09319088741517,36.97597506362344,0 -25.09310666467204,36.97591952306077,0 -25.09301963067628,36.97586557626769,0 -25.09293001141138,36.97581336336376,0 -25.09283805182212,36.97576302710526,0 -25.09274399653476,36.97571470200818,0 -25.09264812900385,36.97566853431594,0 -25.09255073052865,36.97562465951501,0 -25.09245209362467,36.97558320939957,0 -25.09229908339377,36.97552218457985,0 -25.09218788820127,36.97548166263562,0 -25.09208604799574,36.97544980752775,0 -25.09199201153891,36.97542643400168,0 -25.09190420370569,36.97541004226501,0 -25.09181256109717,36.97539742388095,0 -25.09171763745855,36.97538865570902,0 -25.0916201265484,36.97538380236896,0 -25.09152063329002,36.97538290467911,0 -25.09142025210102,36.97538598301016,0 -25.09131999092714,36.9753930070267,0 -25.09122099783237,36.9754038969237,0 -25.0911128325777,36.97542170013835,0 -25.09100141698291,36.97544731288865,0 -25.09088649962878,36.9754807915765,0 -25.09076764836399,36.97552226126516,0 -25.09064516131268,36.9755715466991,0 -25.09051713374772,36.97562934770033,0 -25.09038210744186,36.97569630035522,0 -25.0902353449809,36.97577474712074,0 -25.09013214594721,36.97583411198003,0 -25.0900303591059,36.9758976642232,0 -25.08993044471789,36.97596511661038,0 -25.08983288078465,36.97603614659888,0 -25.08973812634842,36.97611042149546,0 -25.08964667676101,36.97618755459546,0 -25.0895589966974,36.97626715396718,0 -25.08947553440647,36.97634881271375,0 -25.08943579415073,36.97639148150515,0 -25.08939393896925,36.97644096228895,0 -25.08927046702187,36.97660060804756,0 -25.08922913776065,36.97665205075161,0 -25.0891919952024,36.97669497400975,0 -25.08915621774062,36.97673270931329,0 -25.08909818863693,36.97678572972939,0 -25.08903187812722,36.97683672182504,0 -25.08895660417032,36.97688622082518,0 -25.08887089777721,36.9769351974723,0 -25.08879278016712,36.97697514529339,0 -25.08870293525651,36.97701740318177,0 -25.08840091354826,36.97714867656568,0 -25.08829329745038,36.97719750691945,0 -25.08819238064375,36.97724757215696,0 -25.08810554944905,36.97729610266953,0 -25.0880235847956,36.97734905174738,0 -25.08798673303179,36.9773760476776,0 -25.08795242985583,36.97740353791247,0 -25.08792053376187,36.97743163958748,0 -25.08789099764542,36.9774603982892,0 -25.08786375428595,36.97748987959635,0 -25.08783875422469,36.97752013720684,0 -25.08779902495636,36.97757578935203,0 -25.08772182041999,36.97769810087953,0 -25.08768632930422,36.97774996384511,0 -25.08764173796853,36.97780619355404,0 -25.08759043090397,36.97786227653143,0 -25.08753187849489,36.97791880134661,0 -25.08746493164559,36.97797688154984,0 -25.0874038882863,36.97802571052242,0 -25.0873335395744,36.97807875191428,0 -25.08709808702303,36.97824692172392,0 -25.08701505630571,36.97830794230862,0 -25.08693792613224,36.97836815042756,0 -25.08687153810363,36.97842444574821,0 -25.08681032075593,36.97848199140443,0 -25.08675701307213,36.9785387363903,0 -25.08671083637125,36.97859551311935,0 -25.08667140236166,36.97865280636606,0 -25.08659082247235,36.97878533182482,0 -25.08656132445575,36.9788384172956,0 -25.08653621398745,36.97888763977761,0 -25.08651430380169,36.97893553284046,0 -25.08649609758156,36.97898124751568,0 -25.08648142063245,36.97902522464638,0 -25.08647019157698,36.97906771280611,0 -25.08646076760936,36.97911816352704,0 -25.08645484213633,36.97917144818389,0 -25.08645239032844,36.97922777802184,0 -25.08645339521147,36.97928752560532,0 -25.08645777315129,36.97935024579799,0 -25.08646558478457,36.97941779831105,0 -25.08647694734855,36.97949146207481,0 -25.08649280234554,36.9795773756297,0 -25.08650662992265,36.97963487463527,0 -25.08652591220994,36.97969384993399,0 -25.08655082539114,36.97975485584169,0 -25.08658178516058,36.9798189166395,0 -25.0866144905811,36.97987881658247,0 -25.08665372698494,36.97994464558094,0 -25.08680988597018,36.98018661817788,0 -25.08687116490816,36.98028780096556,0 -25.08690135736153,36.98034295519607,0 -25.08692713197608,36.98039503492609,0 -25.08694898385281,36.98044504425539,0 -25.08696713459462,36.98049349897984,0 -25.0869819989215,36.98054000708823,0 -25.08699554906596,36.98058879433302,0 -25.08701921353439,36.98069510860592,0 -25.08703931400094,36.98081692695033,0 -25.08707278410556,36.98107416485379,0 -25.08708966574294,36.98118490861929,0 -25.0871129445103,36.98130054212672,0 -25.08712626206767,36.98135294359227,0 -25.08714092195806,36.98140265518963,0 -25.08715275681361,36.98144452646505,0 -25.08716380562783,36.98149319518039,0 -25.08719417829618,36.9816622446364,0 -25.08720714247751,36.98172506668039,0 -25.0872228808896,36.98178441250651,0 -25.08724085197344,36.98183530332771,0 -25.08725399682252,36.98186468211968,0 -25.08726846139516,36.98189155835748,0 -25.08728434170306,36.98191610953666,0 -25.08730170904104,36.98193844462985,0 -25.08732065579434,36.98195867425604,0 -25.08734121533993,36.98197682639491,0 -25.08736344005595,36.98199294710578,0 -25.08738737384982,36.98200706801203,0 -25.08741836225329,36.98202234404252,0 -25.08745156386297,36.98203658210449,0 -25.0874855600334,36.98204917483139,0 -25.08751898177403,36.98205961519003,0 -25.08756744453461,36.98206995873814,0 -25.08761960496239,36.98207467506145,0 -25.08767584844591,36.98207380443875,0 -25.08773696085822,36.98206733730771,0 -25.08779711031587,36.98205663718851,0 -25.08786452762631,36.98204088961134,0 -25.0880921567719,36.98197624657219,0 -25.08815212900155,36.98195818373884,0 -25.08821325336865,36.9819360266034,0 -25.08827617454165,36.98190954615629,0 -25.08834212985197,36.98187822396269,0 -25.08846132082185,36.98181434400722,0 -25.08866713840293,36.98169428290696,0 -25.08874473281033,36.98165045308775,0 -25.08882266947345,36.98160941306055,0 -25.08889448636624,36.98157525504956,0</coordinates></LinearRing></outerBoundaryIs>
        </Polygon>
      </MultiGeometry>
    </Placemark>
  </Folder>
  <Style id="PolyStyle00">
    <LabelStyle>
      <color>00000000</color>
      <scale>0.000000</scale>
    </LabelStyle>
    <LineStyle>
      <color>ff00ffff</color>
      <width>1.500000</width>
    </LineStyle>
    <PolyStyle>
      <color>00f0f0f0</color>
      <outline>1</outline>
    </PolyStyle>
  </Style>
</Document>
</kml>
